# Supplementary material for: Clinicopathologic and molecular spectrum of gastrointestinal stromal tumor (GIST) with NTRK fusion and marked response to Larotrectinib in GIST with NTRK fusion: a case report
Source: Research Square preprint supplement (doi:10.21203/rs.3.rs-7615382/v1), 2025-09-30
Supplement: Supplementary file 1 [file 0d236add39a97631abbe9413.xlsx]

## Sheet: Sheet2
Supplementary Table 3. Summary of 27 cases of GISTs with NTRK fusion reported previously and the case reported in current study.
Reference			Case Source	Case No.	Clinicopathological characteristics								IHC			Genetic Analysis					Surgery	TRK inhibitors	RECIST1.1	Progress or relapse/Time(month)	Death/Time(month)
Author	Year	PMID			Sex	Age (years)	Tumor site	Size (cm)	Morphology	Mitotic index (/5mm2)	Metastatic or localized GIST	Risk assessment	Pan-TRK	sensitivity and specificity	clone	NTRK fusion	Others	NGS	FISH
Doebele RC et al.	2020	31838007	Entrectinib[NCT02650401,NCT02097810,NCT02568267,ALKA-372-001]	Case 1*	NA	NA	NA	NA	NA	NA	NA	NA	NA	NA	NA	NA	NA	NA	NA	NA	NA	Yes, Entrectinib	NA	NA	NA
Hong DS et al.	2020	32105622	Larotrectinib[NCT02122913,NCT02637687,NCT02576431]	Case 2*	NA	NA	NA	NA	NA	NA	NA	NA	NA	NA	NA	NA	NA	NA	NA	NA	NA	Yes, Larotrectinib	CR,>90%	NA	NA
				Case 3*	NA	NA	NA	NA	NA	NA	NA	NA	NA		NA	NA	NA	NA	NA	NA	NA	Yes, Larotrectinib	CR,>90%	NA	NA
				Case 4*	NA	NA	NA	NA	NA	NA	NA	NA	NA		NA	NA	NA	NA	NA	NA	NA	Yes, Larotrectinib	PR,>30%	NA	NA
				Case 5*	M	55	Small intestine	NA	NA	NA	Metastatic GIST	NA	NA	NA	NA	ETV6::NTRK3 (detected by DNA seq)	This patient’s tumor also possessed likely deleterious alterations in PAX5 and SETD2.	DNA based Seq (FoundationOne™)	NA	NA	No	Yes,imatinib,sunitinib, sorafenib, nilotinib, regorafenib(155 months in total), Larotrectinib(4 months)	PR,44%	Yes,NA	No,159,AWD
Shi E et al.	2016	27974047	12 tumors identified as KIT/PDGFRA/SDH/RAS pathway WT GIST and 12 tumors identified as KIT/PDGFRA/RAS pathway WT and SDH unknown GIST
			five cases of KIT/PDGFRA/SDH/RAS pathway WT GIST	Case 6	M	54	Colon	NA	NA	NA	NA	NA	NA	NA	NA	ETV6::NTRK3 (detected by RNA seq)	NA	RNA based Seq	NA	NA	No	Yes, imatinib(3 months),sunitinib(2 months),sorafenib(2 months),linsitinib(5 months)	NA	Yes,NA	No.12,AWD
Brenca M et al.	2016	26606880	five cases of KIT/PDGFRA/BRAF/SDH WT GIST	Case 7	M	44	Rectum	5	Epithelioid	34	Localized GIST	High Risk	NA	NA	NA	ETV6::NTRK3 (detected by RNA seq)	NA	RNA based Seq	ETV6	ETV6 break probe	Yes	No	NA	No,44	No,44,Alive
D'Alpino Peixoto R et al.	2021	32506289	case report	Case 8	M	20	Rectum	7	Mixed	10	Localized GIST	High Risk	NA	NA	NA	LMNA::NTRK1 (detected by DNA seq)	SUFU Sf7*fs mutation and RAD21 amplification	DNA based Seq (FoundationOne™)	NA	NA	Yes	No	NA	NA	NA
Castillon M et al.	2021	33758144	532 GIST-22 KIT/PDGFRA WT GIST-20 cases of KIT/PDGFRA/BRAF WT GIST	Case 9	M	59	Abdominal mass	NA	Small round cell	NA, Ki67 index:5%	NA	NA	negative	24 samples from 22 cases of KIT PDGFRA WT GISTs:A7H6R:sensitivity:0/1,0%, specificity：5/23,21.7% EPR 17341:sensitivity:0/1,0%, specificity：8/23,34.8%	EPR 17341 and A7H6R	NA	NA	NA	NTRK3,ETV6	NTRK3 break probe,ETV6 break probe	No	No	NA	NA	Yes/DOD,died after biopsy
Lee JH et al.	2022	35681640	31 cases of KIT/PDGFRA WT GIST	Case 10	F	44	Rectum	2.8	NA	17	Localized GIST	High Risk	In the five tumor samples harboring NTRK fusions, only one also tested weakly positive for TRK.	31 cases of KIT/PDGFRA WT GIST: sensitivity:1/5,20%, specificity：22/26,84.6%	EPR 17341	NA	NA	NA	NTRK1	NTRK1/2/3 split FISH probes	Yes	No	NA	Yes,108	Yes,144
				Case 11	M	45	Duodenum	1.7	NA	1	Localized GIST	Very Low Risk			EPR 17341	NA	NA	NA	NTRK3	NTRK1/2/3 split FISH probes	Yes	No	NA	No,72,NED	No,72,NED
				Case 12	F	65	Stomach	1.7	NA	70	Localized GIST	High Risk			EPR 17341	NA	NA	NA	NTRK1	NTRK1/2/3 split FISH probes	Yes	Yes, imatinib (1 year)	NA	Yes,26	Yes,96
				Case 13	F	61	Jejunum	3.9	NA	12	Localized GIST	High Risk			EPR 17341	NA	NA	NA	NTRK1	NTRK1/2/3 split FISH probes	Yes	Yes, imatinib (3 years)	NA	No,48,NED	No,48,NED
				Case 14	M	43	Rectum	11	NA	0	Localized GIST	High Risk			EPR 17341	ETV6::NTRK3 (detected by RNA seq)	NA	RNA based Seq	NTRK3	NTRK1/2/3 split FISH probes	Yes	No	NA	No,36,NED	No,36,NED
Cao Z et al.	2022	36612101	36 cases of KIT/PDGFRA/SDH/BRAF/RAS pathway WT GIST	Case 15	F	52	Mesentery	10	Spindled	8	Localized GIST	High Risk	positive	39 cases of KIT/PDGFRA/SDH WT GIST: sensitivity:1/2,50%, specificity:5/37,13.5%	EPR 17341	ETV6::NTRK3 (detected by DNA seq,not by RNA Seq)	Except for ETV6-NTRK3 fusion, none of clinically significant mutations or fusions were found by NGS. MSS,TMB:4.4.	DNA + RNA Seq (YuanSu S, 671 DNA and 632 RNA gene panel, OrigiMed, Shanghai, China).	ETV6-NTRK3	ETV6-NTRK3 fusion probe	Yes	No	NA	Yes,11	Yes,11
				Case 16	M	56	Stomach	16	Epithelioid	3	Localized GIST	High Risk	negative		EPR 17341	ETV6::NTRK3 (detected by RNA seq，not by DNA Seq)	Except for ETV6-NTRK3 fusion, none of clinically significant mutations or fusions were found by NGS. MSS,TMB:5.5.	DNA + RNA Seq (YuanSu S, 671 DNA and 633 RNA gene panel, OrigiMed, Shanghai, China).	ETV6-NTRK3	ETV6-NTRK3 fusion probe	Yes	Yes, imatinib	NA	No,58,NED	No,58,NED
Zhang HD et al.	2023	37137774	50 cases of KIT/PDGFRA WT GIST	Case 17	M	66	Stomach	2	Spindled	12	Localized GIST	High Risk	positive	50 cases of KIT/PDGFRA WT GIST: sensitivity:3/3,100%, specificity:27/47,57.4%	EPR 17341	NA	NA	NA	NTRK3	NTRK1/2/3 split FISH probes	Yes	No	NA	No,112,NED	No,112,NED
				Case 18	M	47	Duodenum	6	Spindled	＞5	Localized GIST	High Risk	positive		EPR 17341	NA	NA	NA	NTRK3	NTRK1/2/3 split FISH probes	Yes	No	NA	No,78,NED	No,78,NED
				Case 19	F	34	Stomach	8	Epithelioid	NA	Localized GIST	At least Intermediate Risk	positive		EPR 17341	NA	NA	NA	NTRK3	NTRK1/2/3 split FISH probes	Yes	No	NA	No,123,NED	No,123,NED
Machado I et al.	2024	38612518	case report	Case 20	F	53	Abdominal and pelvic mass (attached to the large and small bowel)	22	Mixed	10	Localized GIST	High Risk	positive	NA	NA	ETV6::NTRK3 (detected by RNA seq)	Except for ETV6-NTRK3 fusion,RB1 c.184C>T p.(Q62*), nonsense mutation was detected, and an allelic frequency of 77.80%	DNA + RNA Seq	NTRK3	NTRK3 break probe	Yes	Yes, Entrectinib (3 months)	CR,>90%	Yes,1	No,4,AWD
Xiang WT et al.	2025	40133893	case report	Case 21	M	66	Small intestine	3.8	Spindled	0	Localized GIST	Low Risk	negative	NA	EPR 17341	CDC42BPB::NTRK3	NA	DNA + RNA Seq	NTRK3	NTRK3 break probe	Yes	No	NA	No,15,NED	No,15,NED
Ranjbarian T et al.	2025	39992648	case report	Case 22	F	72	Stomach	5	Mixed	>20	Localized GIST	High Risk	NA	NA	NA	ETV6::NTRK3	Except for ETV6-NTRK3 fusion,PTEN loss was detected	DNA + RNA Seq	NA	NA	Yes	Yes, Larotrectinib	PR	Yes,22	No,54,NED
This study	NA	NA	1273 GIST-47 KIT/PDGFRA WT GIST/26 KIT/PDGFRA/SDH/BRAF WT GIST	Case 23	M	64	Rectum	1.5	Spindled	0	Localized GIST	Very Low Risk	positive	26 KIT/PDGFRA/SDH/BRAF WT GIST: GIST:sensitivity:5/5,100%, specificity:14/21，66.7%	EPR 17341	ETV6::NTRK3 (detected by RNA seq，not by DNA Seq)	Except for ETV6-NTRK3 fusion, none of clinically significant mutations or fusions were found by NGS. MSS,TMB:3.9	DNA + RNA Seq	NTRK3	NTRK1/2/3 split FISH probes	Yes	No	NA	No,51,NED	No,51,NED
				Case 24	M	64	Small intestine	6.5	Epithelioid	2	Localized GIST	High Risk	positive		EPR 17341	ETV6::NTRK3 (detected by RNA seq，not by DNA Seq)	Except for ETV6-NTRK3 fusion, none of clinically significant mutations or fusions were found by NGS. MSS,TMB:4.0	DNA + RNA Seq	NTRK3	NTRK1/2/3 split FISH probes	Yes	No	NA	No,12,NED	No,12,NED
				Case 26	M	60	Small intestine	8	Spindled	2	Localized GIST	High Risk	positive		EPR 17341	ETV6::NTRK3 (detected by DNA Seq and RNA Seq)	Except for ETV6-NTRK3 fusion, ARID1A (CN: 1.03) and TNFRSF14 (CN:1.03) deletion, CDKN2C c.194delT p.L65* were detected by NGS. MSS,TMB:1.94	DNA + RNA Seq	NTRK3	NTRK1/2/3 split FISH probes	Yes	Yes, imatinib (1 year)	NA	No,36,NED	No,36,NED
				Case 25	M	26	Stomach	12	Epithelioid	7	Localized GIST	High Risk	positive		EPR 17341	ETV6::NTRK3 (detected by RNA seq，not by DNA Seq)	Except for ETV6-NTRK3 fusion,CDKN2A (CN:0.6) and CDKN2B (CN:0.6) deletion were detected by NGS.MSS,TMB:1.94	DNA + RNA Seq	NTRK3	NTRK1/2/3 split FISH probes	Yes	Yes,imatinib (42+3months 400mg/600mg qd), regorafenib (15 months), Larotrectinib (3 months)	PR,	Yes,42	No,63,AWD
				Case 27	M	77	Small intestine	10	Spindled	10	Localized GIST	High Risk	positive		EPR 17341	ETV6::NTRK3 (detected by RNA seq，not by DNA Seq)	Except for ETV6-NTRK3 fusion, SETD2 p.V2223 Tfs* 22,deletion of ARID1A and TNFRSF14, amplification of MDM2, CDK4, DDIT3 and HMG2 were detected by NGS. MSS,TMB:3.87	DNA + RNA Seq	NTRK3	NTRK1/2/3 split FISH probes	Yes	No	NA	Yes,6	No,34,AWD
Note: *The case with * indicates that the patient was enrolled in a clinical study of an NTRK inhibitor. NA, not available; NED, no evidence of disease; AWD, alive with disease; DOD, died of disease
