# Supplementary material for: Clinicopathologic and molecular spectrum of gastrointestinal stromal tumor (GIST) with NTRK fusion and marked response to Larotrectinib in GIST with NTRK fusion: a case report
Source: Research Square preprint supplement (doi:10.21203/rs.3.rs-7615382/v1), 2025-09-30
Supplement: Supplementary file 2 [file 628dbe5140723d2f25f1280e.xlsx]

## Sheet: Sheet1
Supplemental table 1. Summary of chromosomal copy number variation (CNV) analysis in 5 cases of GISTs with NTRK fusion
Case No.	Arm	State	Score
Case 5	1p	Del	5
Case 5	11p	Amp	5
Case 5	22q	Del	5
Case 5	4p	Del	5
Case 5	4q	Del	5
Case 5	9p	Del	5
Case 5	9q	Del	5
Case 4	1q	Del	5
Case 4	10q	Del	5
Case 4	14q	Del	5
Case 4	22q	Del	5
Case 4	7p	Del	5
Case 2	1p	Del	5
Case 2	1q	Amp	5
Case 2	7q	Amp	5
Case 3	1p	Del	5
