# Supplementary material for: Clinicopathologic and molecular spectrum of gastrointestinal stromal tumor (GIST) with NTRK fusion and marked response to Larotrectinib in GIST with NTRK fusion: a case report
Source: Research Square preprint supplement (doi:10.21203/rs.3.rs-7615382/v1), 2025-09-30
Supplement: Supplementary file 3 [file e7fb99fb7c8951ae041de636.xlsx]

## Sheet: Sheet2
Supplemental table 2. Summary of the clinicopathological characteristics of cases in different molecular subtypes based on transcriptome analysis in our study and Xie et al's study
Group	Case No.	Driver mutation	Age (years)	Sex	Location	Size (cm)	Mitotic index (/5mm2)	Morphology	Risk assessment	chromosomal copy number variation	pathway	treatment
Group 1 in our study		KIT E11	59	Female	Stomach	4.3	<5	spindled	low risk	not available	interferon signaling up-regulation
	Case 2 used for control	KIT E11	60	Male	Stomach	4.6	<5	spindled	low risk	not available
	Case 3 used for control	KIT E11	67	Female	Stomach	3.1	<5	spindled	low risk	not available
Subtype C1 in Xie et al's study		98% KIT E11, 2% KIT E17			100% Stomach				low risk/Intermediate risk (84%, 43/51)	genome stable, 14q, 22q loss	IFN α/γ up-regulation, high expression of PDL1	no TKI treatment
Group 2 in our study	Case 4 used for control	KIT E11	73	Female	Small intestine	2.8	<5	Spindled	low risk	not available	circulatory system process up-regulation
	Case 5 used for control	KIT E9	65	Male	Small intestine	10.6	>10	Spindled	high risk	not available
	Case 1 in Table 1	ETV6::NTRK3	64	Male	Rectum	1.5	0	Spindled	very low risk	no
	Case 2 in Table 1	ETV6::NTRK3	64	Male	Small intestine	6.5	2	Epithelioid	high risk	1p del, 1q and 7q amp
	Case 3 in Table 1	ETV6::NTRK3	60	Male	Small intestine	8	2	Spindled	high risk	1p del
	Case 5 in Table 1	ETV6::NTRK3	77	Male	Small intestine	10	>10	Spindled	high risk	1p, 22q, 4p. 4q, 9p and 9q del, 11p amp
Subtype C2 in Xie et al's study		all KIT E9, 57% KIT E11			97% Intestine				High risk/metastatic GIST (93%, 28/30)	relatively high chromosomal instability, 1p, 13q, 15q loss	oxidative phosphorylation up-regulation , glycolysis down-regulation, infiltrated by CD8+ T cells,	TKI+immunotherapy
Group 3 in our study	Case 6 used for control	KIT E11 with high VAF, LOH	70	Male	Stomach	11	>10	Spindled	high risk	not available	mitotic cell cycle process up-regulation
	Case 7 used for control	KIT E12 with high VAF, LOH	74	Male	Stomach	6.5	>10	Spindled	high risk	not available
	Case 4 in Table 1	ETV6::NTRK3	26	Male	Stomach	12	>10	Epithelioid	high risk	CDKN2A/2B del 1q, 10q, 7p, 14q and 22q del
Subtype C3 in Xie et al's study		100% KIT E11			94% Stomach				High risk/metastatic GIST (93%, 17/18)	high chromosomal instability, frequent 9p21 (CDKN2A) del	IFN α/γ down-regulation,cell cycle assciated gene sets up-regulation, immune desert, infiltrated by M2 macrophage	TKI+CDK4/6 inhibitors
